# Supplementary material
Source: PubMed Central journal article supplement (PMC123248)
Supplement: pnas_112345699_1.pdf [file pnas_112345699_1.pdf]

Table 3. Conditional probabilities ( $\pi_j$ ) of QTL genotypes upon marker genotypes for  $\mathcal{M}_1$  and  $\mathcal{M}_2$  in the  $F_2$  and its endosperm tissue

| Marker genotype   | $\pi_j \cdot p_{k_1 k_2}$ in the $F_2$                   |                                    |                                    |                                                          |
|-------------------|----------------------------------------------------------|------------------------------------|------------------------------------|----------------------------------------------------------|
|                   | $QQ$                                                     | $Qq$                               | $qq$                               | $qqq$                                                    |
| $M_1 M_1 M_2 M_2$ | $(1-r)^2/4$                                              | $r_1 r_2 (1-r_1)(1-r_2)/2$         | $r_1^2 r_2^2/4$                    | $r_1 r_2 (1-r_1-r_2+3r_1 r_2)/8$                         |
| $M_1 M_1 M_2 m_2$ | $(1-r)r/2$                                               | $r_1(1-r_1)(1-2r_2+2r_2^2)/2$      | $r_1^2 r_2(1-r_2)/2$               | $r_1(1+6r_1 r_2-2r_2-r_1+2r_2^2-6r_1 r_2^2)/8$           |
| $M_1 M_1 m_2 m_2$ | $r^2/4$                                                  | $r_1 r_2(1-r_1)(1-r_2)/2$          | $r_1^2(1-r_2)^2/4$                 | $r_1(1-r_2)(r_2-3r_1 r_2+2r_1)/8$                        |
| $M_1 m_1 M_2 M_2$ | $(1-r)r/2$                                               | $r_2(1-r_2)(1-2r_1+2r_1^2)/2$      | $r_1 r_2^2(1-r_1)/2/8$             | $r_2(2r_1^2-2r_1-r_2+6r_1 r_2-6r_1^2 r_2+1)/8$           |
| $M_1 m_1 M_2 m_2$ | $(1-2r+2r^2)/2$                                          | $(1-2r_1+2r_1^2)(1-2r_2+2r_2^2)/2$ | $r_1 r_2(1-r_1)(1-r_2)$            | $r_1 r_2(1-r_1)(1-r_2)+(1-2r_2+2r_2^2)(2r_1^2-2r_1+1)/8$ |
| $M_1 m_1 m_2 m_2$ | $(1-r)r/2$                                               | $r_2(1-r_2)(1-r_1)/2$              | $r_1(1-r_1)(1-r_2)^2/4$            | $(1-r_2)(6r_1^2 r_2-6r_1 r_2+r_2-4r_1^2+4r_1)/8$         |
| $m_1 M_1 M_2 M_2$ | $r^2/4$                                                  | $r_1 r_2(1-r_1)(1-r_2)/2$          | $r_1^2(1-r_2)^2/4$                 | $r_2(1-r_1)(r_1-3r_1 r_2+2r_2)/8$                        |
| $m_1 M_1 M_2 m_2$ | $r(1-r)/2$                                               | $r_1(1-r_1)(1-2r_2+2r_2^2)/2$      | $r_2(1-r_1)^2(1-r_2)/2$            | $(1-r_1)(6r_1 r_2-6r_1 r_2+r_1-4r_2^2+4r_2)/8$           |
| $m_1 m_1 m_2 m_2$ | $(1-r)^2/4$                                              | $r_1 r_2(1-r_1)(1-r_2)/2$          | $(1-r_1)^2(1-r_2)^2/4$             | $(1-r_1)(1-r_2)(3r_1 r_2-2r_1+2-2r_2)/8$                 |
| Marker genotype   | $\pi_j \cdot p_{k_1 k_2}$ in the endosperm of the $F_2$  |                                    |                                    |                                                          |
|                   | $QQQ$                                                    | $QQq$                              | $qQq$                              | $qqq$                                                    |
| $M_1 M_1 M_2 M_2$ | $(1-r_1)(1-r_2)(3r_1 r_2-2r_1-2r_2+2)/8$                 | $r_1 r_2(1-r_1)(1-r_2)/8$          | $r_1 r_2(1-r_1-r_2)/8$             | $r_1 r_2(1-r_1-r_2+3r_1 r_2)/8$                          |
| $M_1 M_1 M_2 m_2$ | $(1-r_1)(6r_1 r_2^2-6r_1 r_2+r_1-4r_2^2+4r_2)/8$         | $r_1(1-r_1)(1-2r_2+2r_2^2)/8$      | $r_1(1-r_1)(1-2r_2+2r_2^2)/8$      | $r_1(1+6r_1 r_2-2r_2-r_1+2r_2^2-6r_1 r_2^2)/8$           |
| $M_1 M_1 m_2 m_2$ | $r_2(1-r_1)(r_1-3r_1 r_2+2r_2)/8$                        | $r_1 r_2(1-r_1)(1-r_2)/8$          | $r_1 r_2(1-r_1)(1-r_2)/8$          | $r_1(1-r_2)(r_2-3r_1 r_2+2r_1)/8$                        |
| $M_1 m_1 M_2 M_2$ | $(1-r_2)(6r_1^2 r_2-6r_1 r_2+r_2-4r_1^2+4r_1)/8$         | $r_2(1-r_2)(1-2r_1+2r_1^2)/8$      | $r_2(1-r_2)(1-2r_1+2r_1^2)/8$      | $r_2(2r_1^2-2r_1-r_2+6r_1 r_2-6r_1^2 r_2+1)/8$           |
| $M_1 m_1 M_2 m_2$ | $r_1 r_2(1-r_1)(1-r_2)+(1-2r_2+2r_2^2)(2r_1^2-2r_1+1)/8$ | $(1-2r_1+2r_1^2)(1-2r_2+2r_2^2)/8$ | $(1-2r_1+2r_1^2)(1-2r_2+2r_2^2)/8$ | $r_1 r_2(1-r_1)(1-r_2)+(1-2r_2+2r_2^2)(2r_1^2-2r_1+1)/8$ |
| $M_1 m_1 m_2 m_2$ | $r_2(2r_1^2-2r_1-r_2+6r_1 r_2-6r_1^2 r_2+1)/8$           | $r_2(1-r_2)(1-2r_1+2r_1^2)/8$      | $r_2(1-r_2)(1-2r_1+2r_1^2)/8$      | $(1-r_2)(6r_1^2 r_2-6r_1 r_2+r_2-4r_1^2+4r_1)/8$         |
| $m_1 M_1 M_2 M_2$ | $r_1(1-r_2)(r_2-3r_1 r_2+2r_1)/8$                        | $r_1 r_2(1-r_1)(1-r_2)/8$          | $r_1 r_2(1-r_1)(1-r_2)/8$          | $r_2(1-r_1)(r_1-3r_1 r_2+2r_2)/8$                        |
| $m_1 M_1 M_2 m_2$ | $r_1(1+6r_1 r_2-2r_2-r_1+2r_2^2-6r_1 r_2^2)/8$           | $r_1(1-r_1)(1-2r_2+2r_2^2)/8$      | $r_1(1-r_1)(1-2r_2+2r_2^2)/8$      | $(1-r_1)(6r_1 r_2-6r_1 r_2+r_1-4r_2^2+4r_2)/8$           |
| $m_1 m_1 m_2 m_2$ | $r_1 r_2(1-r_1-r_2+3r_1 r_2)/8$                          | $r_1 r_2(1-r_1)(1-r_2)/8$          | $r_1 r_2(1-r_1)(1-r_2)/8$          | $(1-r_1)(1-r_2)(3r_1 r_2-2r_1+2-2r_2)/8$                 |

$p_{k_1 k_2}$  is the genotype frequency of two-locus marker genotype  $k_1 k_2$  at markers  $\mathcal{M}_1$  and  $\mathcal{M}_2$ .  $r_1$ ,  $r_2$  and  $r$  are the recombination fractions between marker  $\mathcal{M}_1$  and the QTL, between the QTL and marker  $\mathcal{M}_2$ , and between the two flanking markers.
