# Supplementary material
Source: PubMed Central journal article supplement (PMC123248)

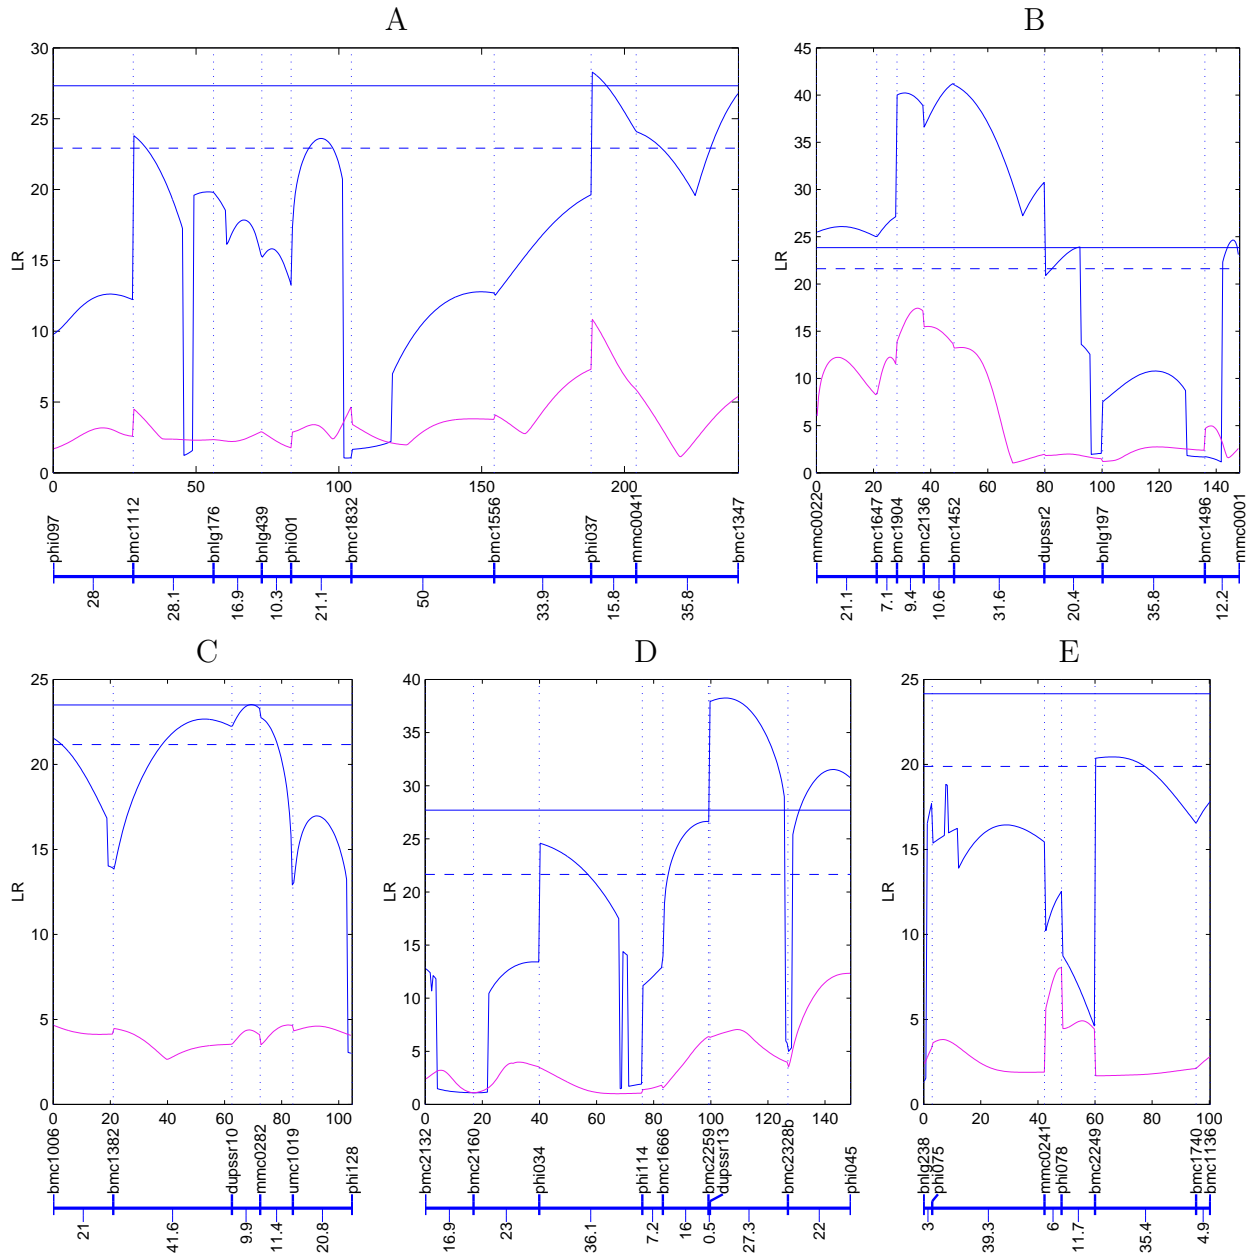

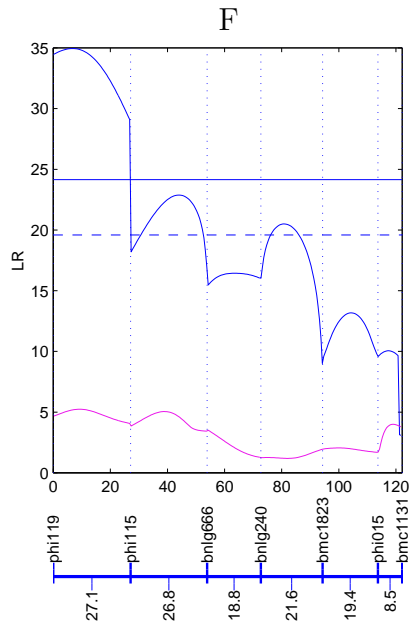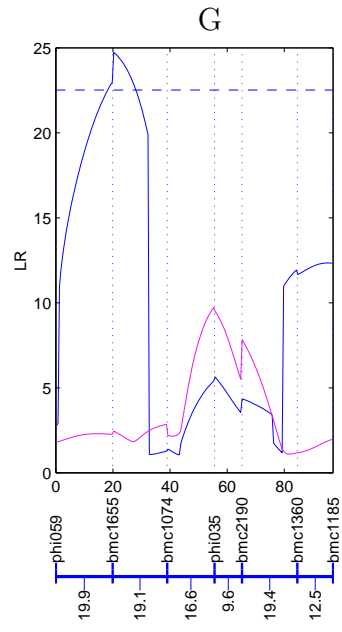

Supplement: pnas_112345699_3.pdf [file pnas_112345699_3.pdf]
